# Supplementary material for: Numeric social-media posts engage people with climate science
Source: Research Square preprint supplement (doi:10.21203/rs.3.rs-2944718/v1), 2023-05-30
Supplement: Supplementary file 1 [file ede3e17483b248d444451877.docx]

Supplemental Table 1. Study 2 – For each primary, secondary, and exploratory variable, estimated marginal means, standard errors (SE), df, and confidence intervals in each tweet condition and all contrasts between them including mean difference, SE, df, t-values, Tukey-adjusted p-values, confidence intervals, and effect size indicator (Cohen’s D).

| **Engagement variables** | |  |  |  |  |  |  |  |  |
| --- | --- | --- | --- | --- | --- | --- | --- | --- | --- |
| Likely to share (1-5) | Conditions | Mean | SE | df | lower.CL | upper.CL |  |  |  |
|  | Precise-consequence number (1) | 2.281 | 0.079 | 202.170 | 2.126 | 2.436 |  |  |  |
|  | Imprecise-consequence number (2) | 2.176 | 0.079 | 202.410 | 2.020 | 2.331 |  |  |  |
|  | Non-consequences number (3) | 2.187 | 0.079 | 202.640 | 2.032 | 2.342 |  |  |  |
|  | Non-numeric (4) | 2.136 | 0.079 | 202.650 | 1.980 | 2.291 |  |  |  |
|  | Contrasts | Mean Diff | SE | df | t.ratio | p.value | lower.CL | upper.CL | Cohen's D |
|  | 1-2 | 0.105 | 0.033 | 4019.010 | 3.175 | 0.008 | 0.020 | 0.190 | 0.141 |
|  | 1-3 | 0.094 | 0.033 | 4018.720 | 2.825 | 0.025 | 0.008 | 0.179 | 0.126 |
|  | 1-4 | 0.145 | 0.033 | 4019.920 | 4.378 | 0.000 | 0.060 | 0.230 | 0.196 |
|  | 2-3 | -0.011 | 0.033 | 4018.340 | -0.345 | 0.986 | -0.097 | 0.074 | -0.015 |
|  | 2-4 | 0.040 | 0.033 | 4020.040 | 1.209 | 0.621 | -0.045 | 0.126 | 0.054 |
|  | 3-4 | 0.052 | 0.033 | 4019.320 | 1.552 | 0.407 | -0.034 | 0.137 | 0.069 |
| Want to find out more (1-5) | Conditions | Mean | SE | df | lower.CL | upper.CL |  |  |  |
|  | Precise-consequence number (1) | 2.968 | 0.085 | 202.410 | 2.801 | 3.135 |  |  |  |
|  | Imprecise-consequence number (2) | 2.865 | 0.085 | 202.680 | 2.698 | 3.032 |  |  |  |
|  | Non-consequences number (3) | 2.855 | 0.085 | 202.940 | 2.688 | 3.022 |  |  |  |
|  | Non-numeric (4) | 2.818 | 0.085 | 202.960 | 2.651 | 2.985 |  |  |  |
|  | Contrasts | Mean Diff | SE | df | t.ratio | p.value | lower.CL | upper.CL | Cohen's D |
|  | 1-2 | 0.103 | 0.038 | 4020.780 | 2.740 | 0.031 | 0.006 | 0.200 | 0.122 |
|  | 1-3 | 0.113 | 0.038 | 4020.450 | 2.987 | 0.015 | 0.016 | 0.210 | 0.133 |
|  | 1-4 | 0.150 | 0.038 | 4021.810 | 3.956 | 0.000 | 0.052 | 0.247 | 0.177 |
|  | 2-3 | 0.009 | 0.038 | 4020.010 | 0.251 | 0.994 | -0.088 | 0.107 | 0.011 |
|  | 2-4 | 0.046 | 0.038 | 4021.940 | 1.221 | 0.613 | -0.051 | 0.144 | 0.055 |
|  | 3-4 | 0.037 | 0.038 | 4021.130 | 0.970 | 0.767 | -0.061 | 0.134 | 0.043 |
| **Opinions about tweet** | |  |  |  |  |  |  |  |  |
| Came from expert (1-5) | Conditions | Mean | SE | df | lower.CL | upper.CL |  |  |  |
|  | Precise-consequence number (1) | 3.171 | 0.085 | 37.780 | 2.998 | 3.344 |  |  |  |
|  | Imprecise-consequence number (2) | 2.698 | 0.085 | 37.840 | 2.525 | 2.871 |  |  |  |
|  | Non-consequences number (3) | 2.781 | 0.085 | 37.890 | 2.609 | 2.954 |  |  |  |
|  | Non-numeric (4) | 2.562 | 0.085 | 37.920 | 2.390 | 2.735 |  |  |  |
|  | Contrasts | Mean Diff | SE | df | t.ratio | p.value | lower.CL | upper.CL | Cohen's D |
|  | 1-2 | 0.473 | 0.041 | 4052.260 | 11.507 | <.0001 | 0.368 | 0.579 | 0.511 |
|  | 1-3 | 0.390 | 0.041 | 4051.120 | 9.465 | <.0001 | 0.284 | 0.496 | 0.421 |
|  | 1-4 | 0.609 | 0.041 | 4055.530 | 14.759 | <.0001 | 0.503 | 0.715 | 0.658 |
|  | 2-3 | -0.083 | 0.041 | 4049.210 | -2.025 | 0.179 | -0.189 | 0.022 | -0.090 |
|  | 2-4 | 0.136 | 0.041 | 4055.980 | 3.278 | 0.006 | 0.029 | 0.242 | 0.146 |
|  | 3-4 | 0.219 | 0.041 | 4053.570 | 5.295 | <.0001 | 0.113 | 0.325 | 0.237 |
| Trustworthy (1-6) | Conditions | Mean | SE | df | lower.CL | upper.CL |  |  |  |
|  | Precise-consequence number (1) | 4.178 | 0.102 | 94.770 | 3.976 | 4.381 |  |  |  |
|  | Imprecise-consequence number (2) | 3.976 | 0.102 | 94.880 | 3.774 | 4.179 |  |  |  |
|  | Non-consequences number (3) | 4.063 | 0.102 | 94.990 | 3.860 | 4.266 |  |  |  |
|  | Non-numeric (4) | 3.981 | 0.102 | 95.000 | 3.779 | 4.184 |  |  |  |
|  | Contrasts | Mean Diff | SE | df | t.ratio | p.value | lower.CL | upper.CL | Cohen's D |
|  | 1-2 | 0.202 | 0.043 | 4023.850 | 4.714 | <.0001 | 0.092 | 0.312 | 0.210 |
|  | 1-3 | 0.115 | 0.043 | 4023.470 | 2.687 | 0.036 | 0.005 | 0.226 | 0.120 |
|  | 1-4 | 0.197 | 0.043 | 4025.120 | 4.582 | <.0001 | 0.087 | 0.308 | 0.205 |
|  | 2-3 | -0.087 | 0.043 | 4022.810 | -2.019 | 0.181 | -0.197 | 0.024 | -0.090 |
|  | 2-4 | -0.005 | 0.043 | 4025.160 | -0.120 | 0.999 | -0.116 | 0.106 | -0.005 |
|  | 3-4 | 0.082 | 0.043 | 4024.240 | 1.893 | 0.231 | -0.029 | 0.192 | 0.085 |
| **Exploratory analyses of tweet opinions** | | |  |  |  |  |  |  |  |
| Accurate (1-6) | Conditions | Mean | SE | df | lower.CL | upper.CL |  |  |  |
|  | Precise-consequence number (1) | 4.146 | 0.107 | 91.050 | 3.933 | 4.360 |  |  |  |
|  | Imprecise-consequence number (2) | 3.952 | 0.107 | 91.160 | 3.739 | 4.165 |  |  |  |
|  | Non-consequences number (3) | 4.053 | 0.107 | 91.260 | 3.840 | 4.266 |  |  |  |
|  | Non-numeric (4) | 3.947 | 0.107 | 91.270 | 3.733 | 4.160 |  |  |  |
|  | Contrasts | Mean Diff | SE | df | t.ratio | p.value | lower.CL | upper.CL | Cohen's D |
|  | 1-2 | 0.194 | 0.045 | 4023.910 | 4.342 | 0.000 | 0.079 | 0.310 | 0.193 |
|  | 1-3 | 0.093 | 0.045 | 4023.520 | 2.080 | 0.160 | -0.022 | 0.209 | 0.093 |
|  | 1-4 | 0.200 | 0.045 | 4025.180 | 4.446 | 0.000 | 0.084 | 0.315 | 0.199 |
|  | 2-3 | -0.101 | 0.045 | 4022.860 | -2.253 | 0.109 | -0.217 | 0.014 | -0.101 |
|  | 2-4 | 0.005 | 0.045 | 4025.220 | 0.116 | 0.999 | -0.110 | 0.121 | 0.005 |
|  | 3-4 | 0.106 | 0.045 | 4024.300 | 2.363 | 0.085 | -0.009 | 0.222 | 0.106 |
| Clear (1-6) | Conditions | Mean | SE | df | lower.CL | upper.CL |  |  |  |
|  | Precise-consequence number (1) | 4.547 | 0.101 | 83.950 | 4.346 | 4.748 |  |  |  |
|  | Imprecise-consequence number (2) | 4.360 | 0.101 | 84.060 | 4.159 | 4.561 |  |  |  |
|  | Non-consequences number (3) | 4.434 | 0.101 | 84.170 | 4.233 | 4.634 |  |  |  |
|  | Non-numeric (4) | 4.331 | 0.101 | 84.180 | 4.130 | 4.532 |  |  |  |
|  | Contrasts | Mean Diff | SE | df | t.ratio | p.value | lower.CL | upper.CL | Cohen's D |
|  | 1-2 | 0.187 | 0.046 | 4028.260 | 4.084 | 0.000 | 0.069 | 0.304 | 0.182 |
|  | 1-3 | 0.113 | 0.046 | 4027.780 | 2.477 | 0.064 | -0.004 | 0.231 | 0.110 |
|  | 1-4 | 0.216 | 0.046 | 4029.830 | 4.715 | <.0001 | 0.098 | 0.334 | 0.210 |
|  | 2-3 | -0.073 | 0.046 | 4026.950 | -1.599 | 0.379 | -0.191 | 0.044 | -0.071 |
|  | 2-4 | 0.029 | 0.046 | 4029.870 | 0.640 | 0.919 | -0.089 | 0.147 | 0.029 |
|  | 3-4 | 0.103 | 0.046 | 4028.740 | 2.234 | 0.114 | -0.015 | 0.221 | 0.100 |
| Interesting (1-6) | Conditions | Mean | SE | df | lower.CL | upper.CL |  |  |  |
|  | Precise-consequence number (1) | 4.245 | 0.095 | 156.040 | 4.058 | 4.433 |  |  |  |
|  | Imprecise-consequence number (2) | 4.138 | 0.095 | 156.270 | 3.950 | 4.325 |  |  |  |
|  | Non-consequences number (3) | 4.066 | 0.095 | 156.490 | 3.878 | 4.253 |  |  |  |
|  | Non-numeric (4) | 3.996 | 0.095 | 156.500 | 3.808 | 4.183 |  |  |  |
|  | Contrasts | Mean Diff | SE | df | t.ratio | p.value | lower.CL | upper.CL | Cohen's D |
|  | 1-2 | 0.108 | 0.044 | 4024.040 | 2.435 | 0.071 | -0.006 | 0.222 | 0.108 |
|  | 1-3 | 0.180 | 0.044 | 4023.650 | 4.048 | 0.000 | 0.066 | 0.293 | 0.181 |
|  | 1-4 | 0.250 | 0.044 | 4025.310 | 5.628 | <.0001 | 0.136 | 0.364 | 0.251 |
|  | 2-3 | 0.072 | 0.044 | 4023.050 | 1.615 | 0.370 | -0.042 | 0.186 | 0.072 |
|  | 2-4 | 0.142 | 0.044 | 4025.410 | 3.192 | 0.008 | 0.028 | 0.256 | 0.143 |
|  | 3-4 | 0.070 | 0.045 | 4024.450 | 1.580 | 0.390 | -0.044 | 0.185 | 0.071 |
